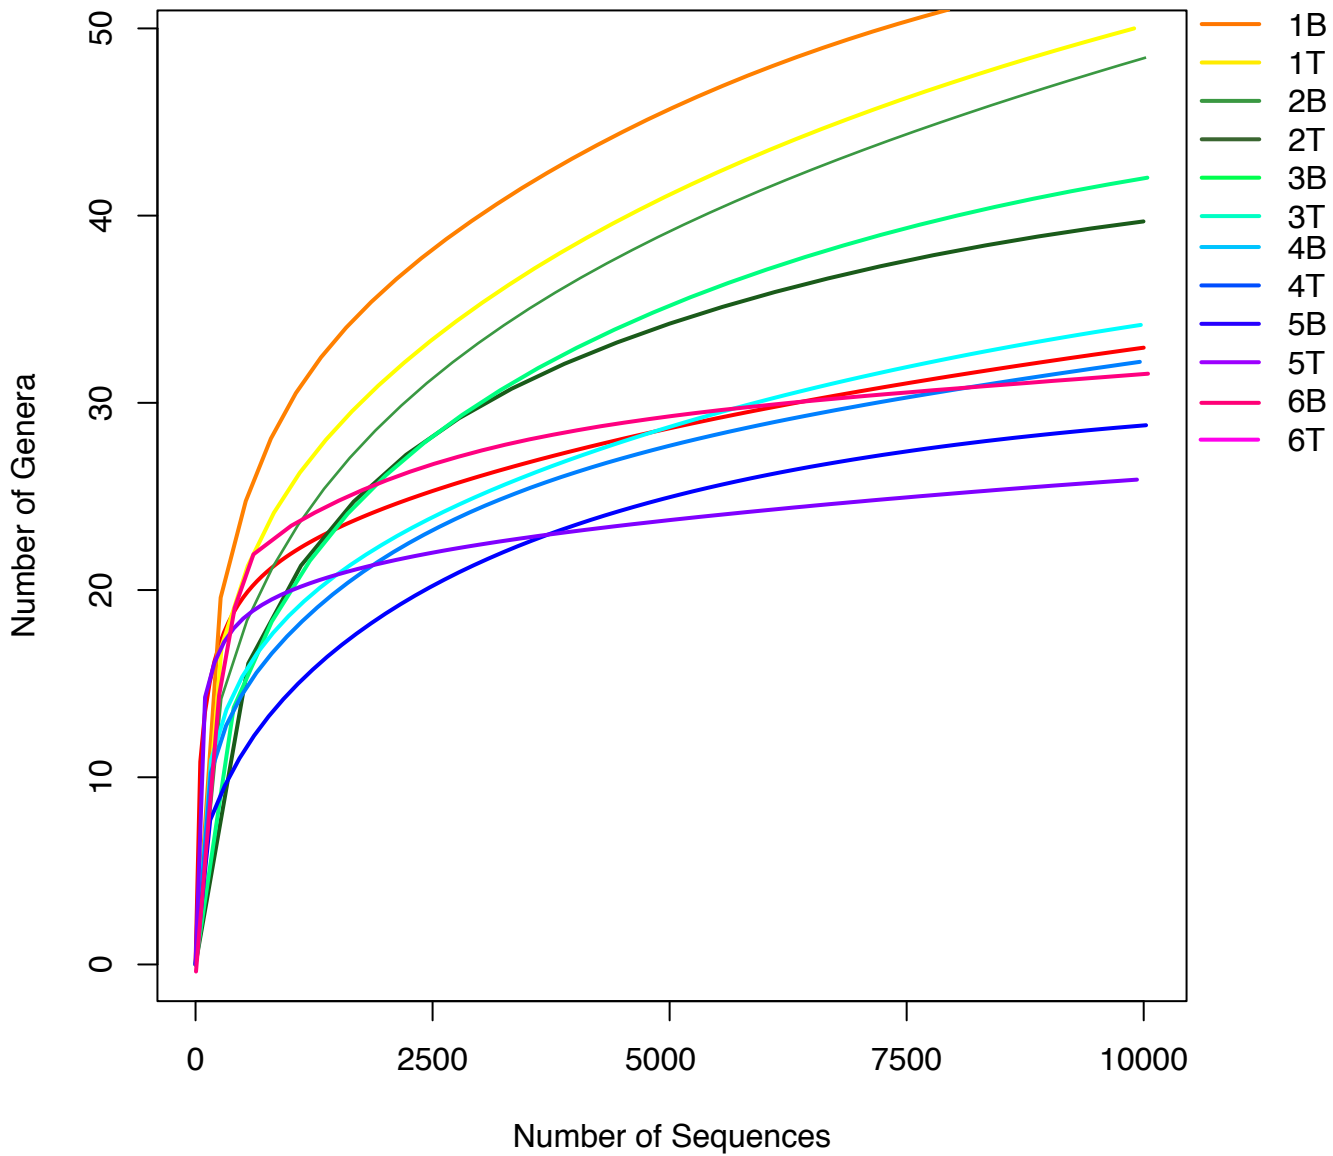

Source: https://storage.googleapis.com/plos-corpus-prod/10.1371/journal.pone.0074914/1/pone.0074914.s005.pdf
