# Supplementary material for: A New Method for Extracting Skin Microbes Allows Metagenomic Analysis of Whole-Deep Skin
Source: PLOS journal article supplement (doi:10.1371/journal.pone.0074914), 2013-09-20
Supplement: S8 (10.1371/journal.pone.0074914.s008) [file journal.pone.0074914.s008]

## Canonical Correspondence Analysis

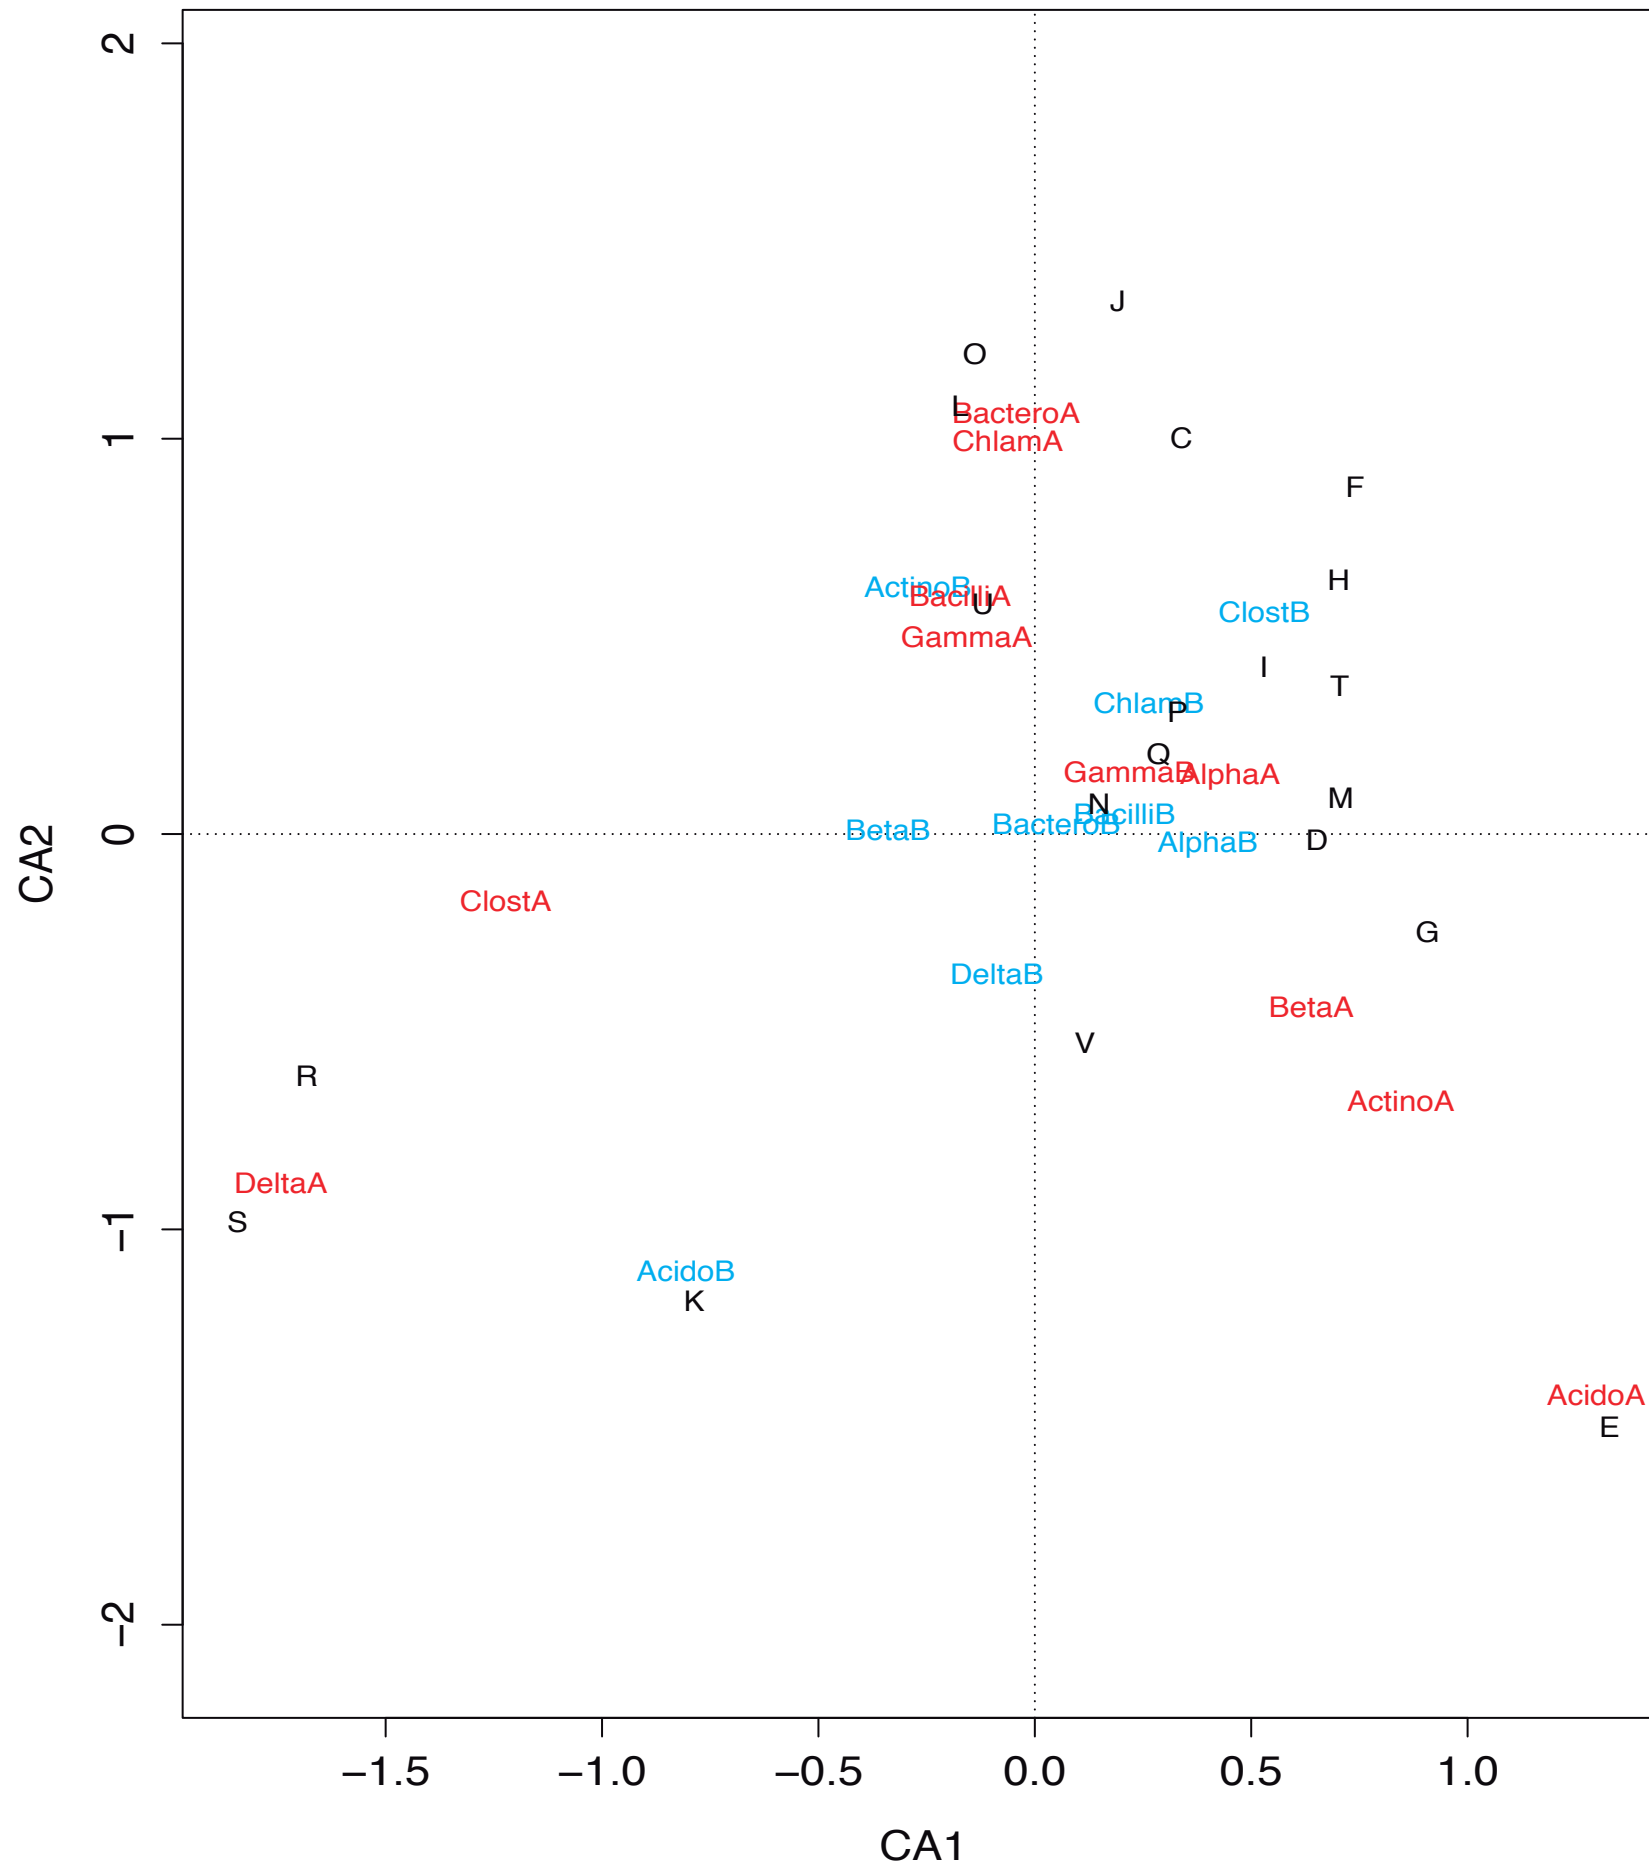

- [J] Translation, ribosomal structure and biogenesis
- [A] RNA processing and modification
- [K] Transcription
- [L] Replication, recombination and repair
- [B] Chromatin structure and dynamics
- [D] Cell cycle control, cell division, chromosome partitioning
- [Y] Nuclear structure
- [V] Defense mechanisms
- [T] Signal transduction mechanisms
- [M] Cell wall/membrane/envelope biogenesis
- [N] Cell motility
- [Z] Cytoskeleton
- [W] Extracellular structures
- [U] Intracellular trafficking, secretion, and vesicular transport
- [O] Posttranslational modification, protein turnover, chaperones
- [C] Energy production and conversion
- [G] Carbohydrate transport and metabolism
- [E] Amino acid transport and metabolism
- [F] Nucleotide transport and metabolism
- [H] Coenzyme transport and metabolism
- [I] Lipid transport and metabolism
- [P] Inorganic ion transport and metabolism
- [Q] Secondary metabolites biosynthesis, transport and catabolism
- [R] General function prediction only

- |           |                     |
|-----------|---------------------|
| [Acido]   | Acidobacteria       |
| [Actino]  | Actinobacteria      |
| [Alpha]   | Alphaproteobacteria |
| [Bactero] | Bacteroidia         |
| [Bacill]  | Bacilli             |
| [Beta]    | Betaproteobacteria  |
| [Chlam]   | Chlamidia           |
| [Clost]   | Clostridia          |
| [Delta]   | Deltaproteobacteria |
| [Gamma]   | Gammaproteobacteria |
