# Supplementary material for: A New Method for Extracting Skin Microbes Allows Metagenomic Analysis of Whole-Deep Skin
Source: PLOS journal article supplement (doi:10.1371/journal.pone.0074914), 2013-09-20

# Principal Coordinate Analysis of the taxonomic relative abundances

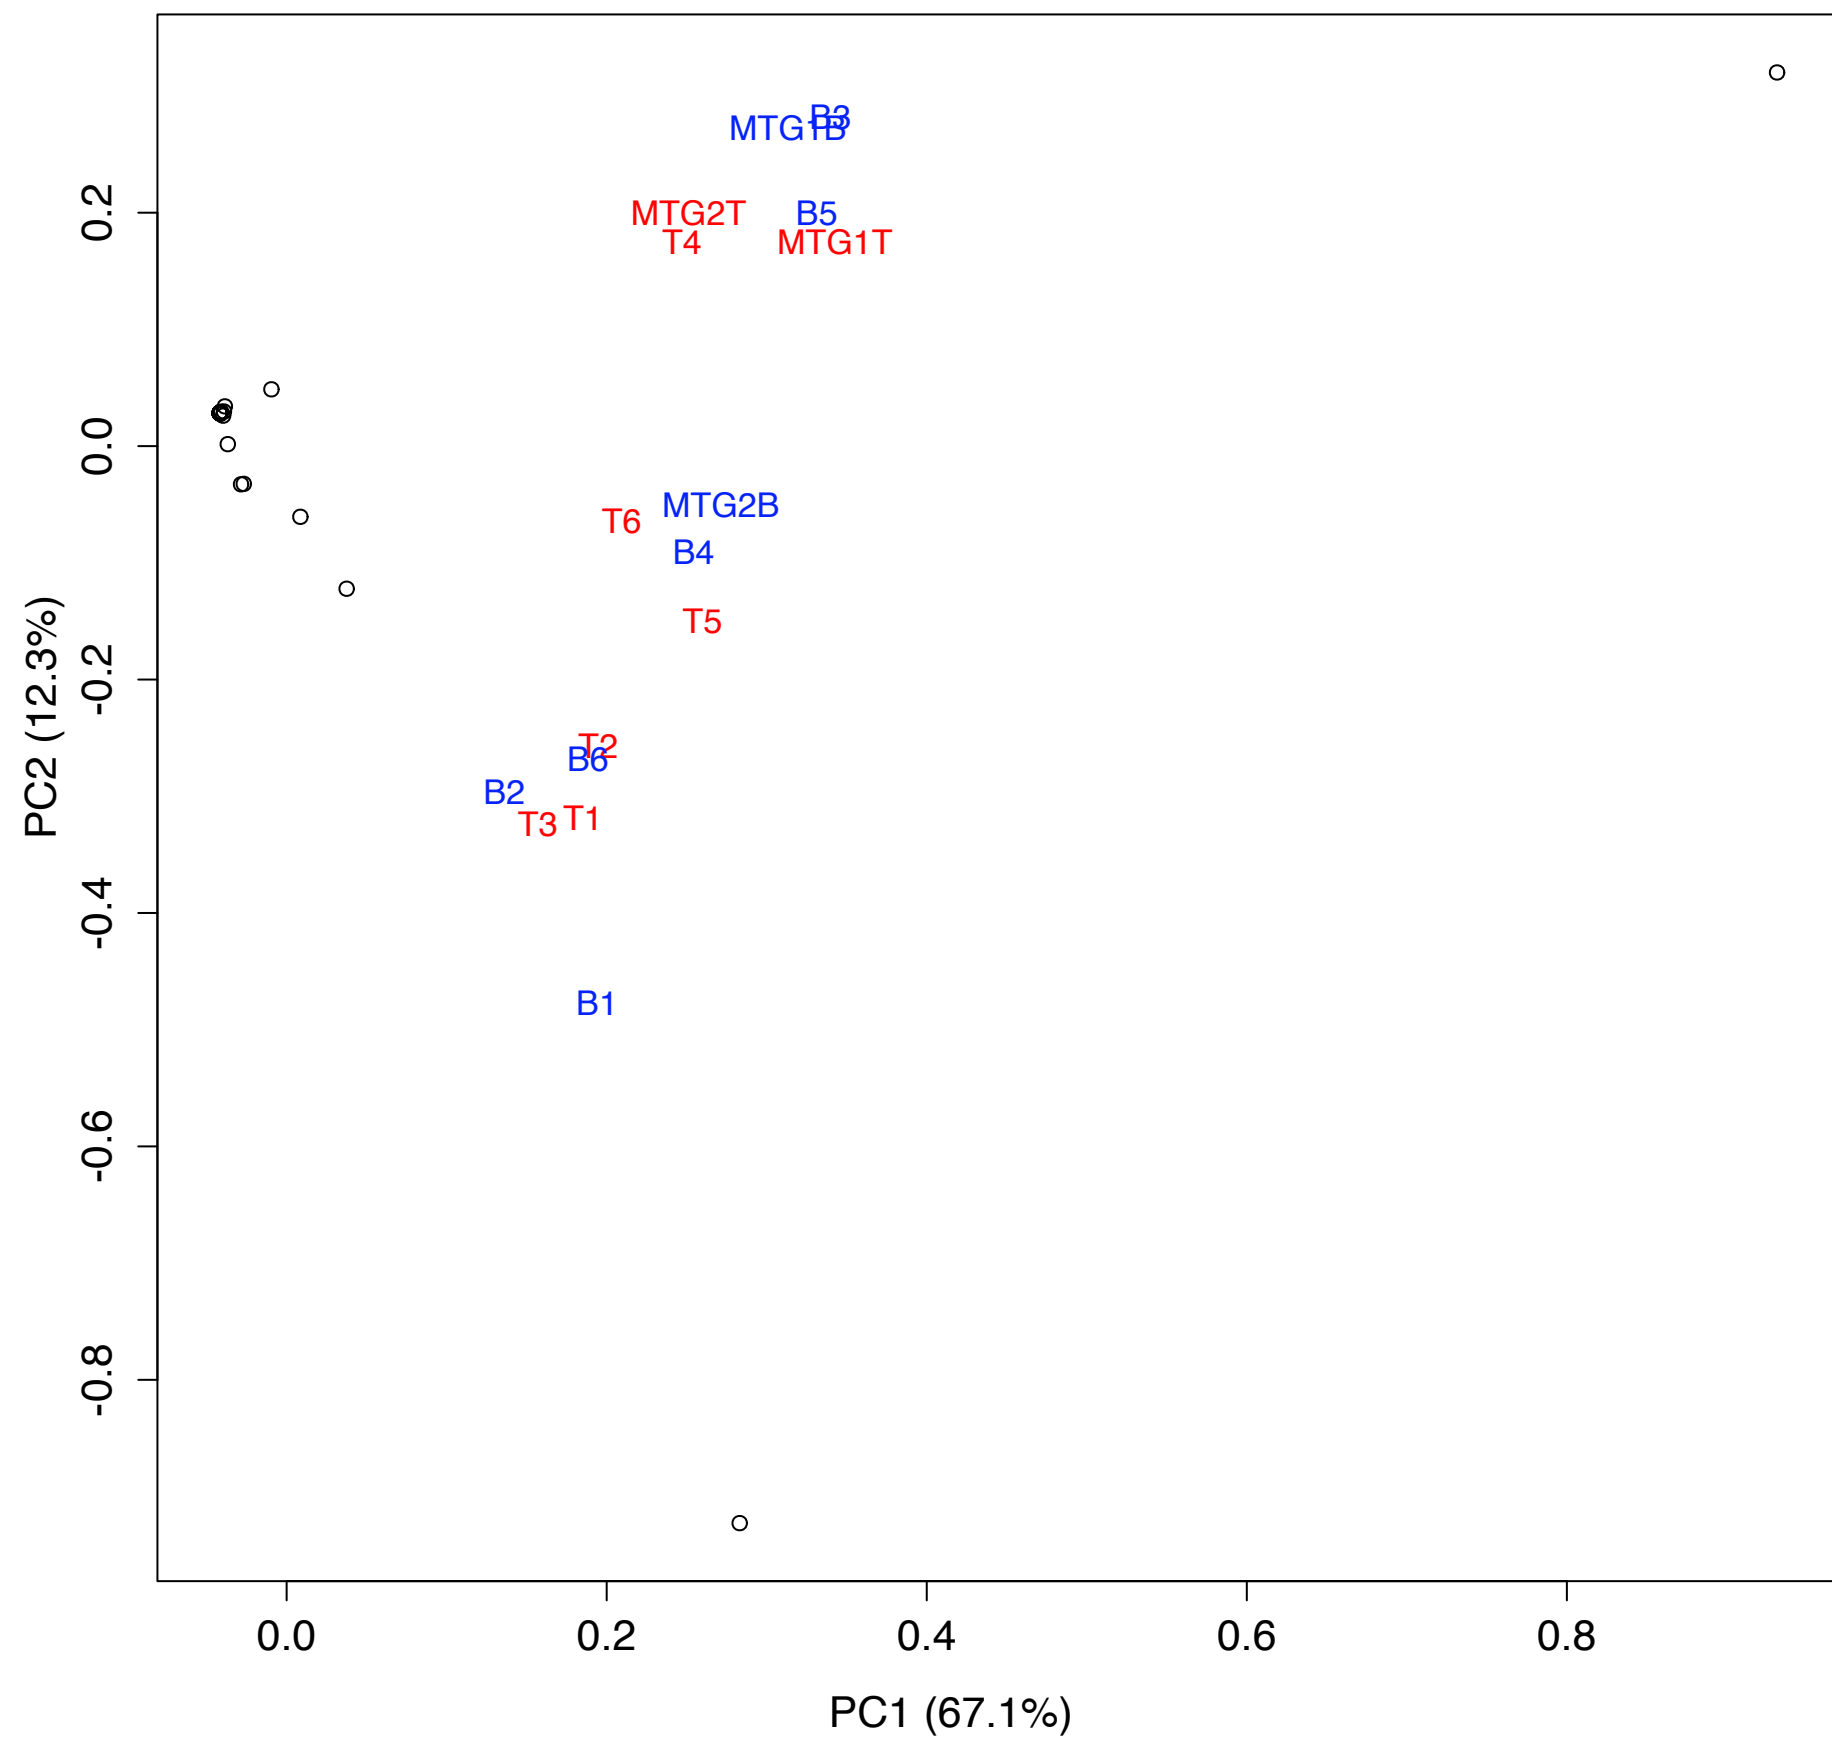

Supplement: S12 (10.1371/journal.pone.0074914.s012) [file journal.pone.0074914.s012]
